# Supplementary material for: Cu5FeS4 quantum dots as a single-component photo-assisted electrocatalyst for efficient hydrogen evolution
Source: Royal Society of Chemistry journal article supplement (doi:10.1039/d2ta07852j), 2022-12-20
Supplement: d2ta07852j1.pdf [file d2ta07852j1.pdf]

## *Supporting information*

### **Cu<sub>5</sub>FeS<sub>4</sub> quantum dots as single-component photo-assisted electrocatalyst for efficient hydrogen evolution**

Dongxu Zhang,<sup>a</sup> Yanhong Liu,<sup>\*a</sup> Longhua Li,<sup>a</sup> Di Li,<sup>a</sup> Tianyao Jiang,<sup>a</sup> Hui Huang,<sup>b</sup> Deli Jiang,<sup>\*a</sup> Zhenhui Kang,<sup>\*bc</sup> and Baodong Mao<sup>\*a</sup>

<sup>a</sup>*School of Chemistry and Chemical Engineering, Jiangsu University, 301 Xuefu Road, Zhenjiang 212013, China*

<sup>b</sup>*Institute of Functional Nano and Soft Materials (FUNSOM), Jiangsu Key Laboratory for Carbon-based Functional Materials and Devices, Soochow University, 199 Ren'ai Road, Suzhou 215123, China*

<sup>c</sup>*Macao Institute of Materials Science and Engineering (MIMSE), MUST-SUDA Joint Research Center for Advanced Functional Materials, Macau University of Science and Technology, Taipa 999078, Macao, China*

*\*Corresponding authors E-mail: liuyh@ujs.edu.cn (Y.L.); dlj@ujs.edu.cn (D.J.); zhkang@suda.edu.cn (Z.K.); maobd@ujs.edu.cn (B.M.).*

## Electrochemical Measurements

All the electrochemical measurements were performed with a CHI 760E electrochemical analyzer (CH Instruments, Inc., Shanghai) in a standard three-electrode system with a rate of  $5 \text{ mV s}^{-1}$ . Typically, the catalysts grown on Nickel foam (NF) were employed as working electrode, Hg/HgO as reference electrode, and graphite rod as the counter electrode for HER tests in 1.0 M KOH electrolyte, in which the NF was ultrasonically treated in acetone and ethanol solution and followed by washing with distilled water. Notedly, Ag/AgCl and Hg/HgO are used as reference electrodes when electrolyte pH=3 and 7, respectively. The potentials vs. reversible hydrogen electrode (RHE) were converted from the reference scale by using the following equations:  $E_{(RHE)} = E_{(Hg/HgO)} + 0.098 \text{ V} + 0.059 \times \text{pH}$  and  $E_{(RHE)} = E_{(Ag/AgCl)} + 0.1976 \text{ V} + 0.059 \times \text{pH}$ .

The double-layer capacitance ( $C_{dl}$ ) was measured in 1.0 M KOH solution by cyclic voltammetry (CV) with scanning rates of 10-100 mV/s in the potential range from 0.72 to 0.82 V versus RHE. Electrochemical impedance spectra (EIS) and Mott-Schottky plots of the samples were measured in three different electrolytes, including 0.5 M  $\text{H}_2\text{SO}_4$ , 1.0 M PBS and 1.0 M KOH.

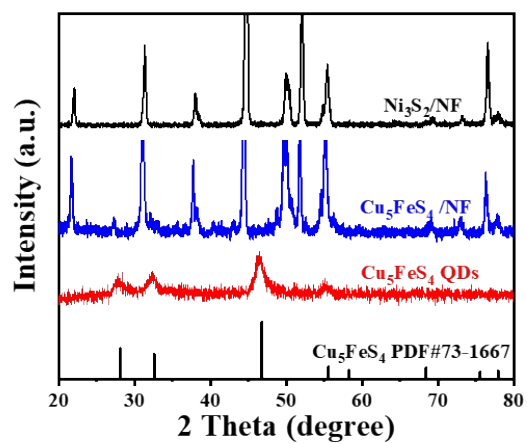

**Fig. S1** The XRD patterns of Cu<sub>5</sub>FeS<sub>4</sub> QDs (JCPDS no. 73-1667), Cu<sub>5</sub>FeS<sub>4</sub>/NF and Ni<sub>3</sub>S<sub>2</sub>/NF.

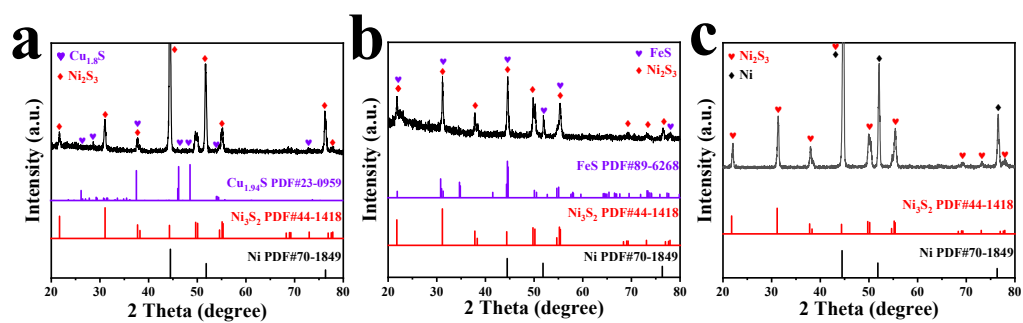

**Fig. S2** The XRD patterns of (a) Cu<sub>2-x</sub>S (JCPDS no. 23-0959), (b) FeS (JCPDS no. 89-6268) and (c) Ni<sub>3</sub>S<sub>2</sub> (JCPDS no. 44-1418) samples.

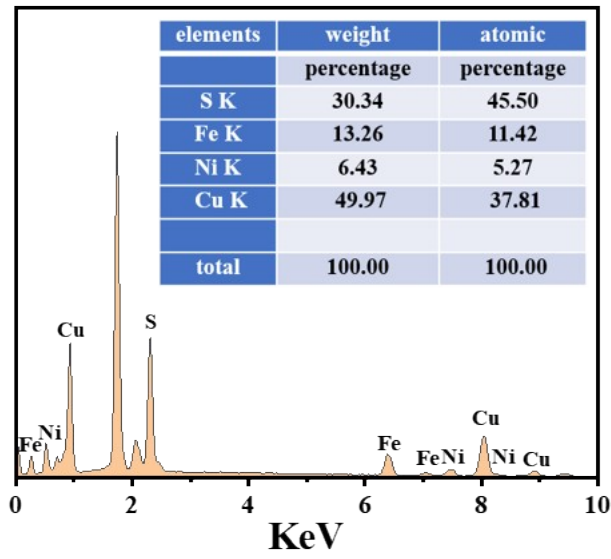

**Fig. S3** EDX spectrum of the Cu<sub>5</sub>FeS<sub>4</sub> QDs.

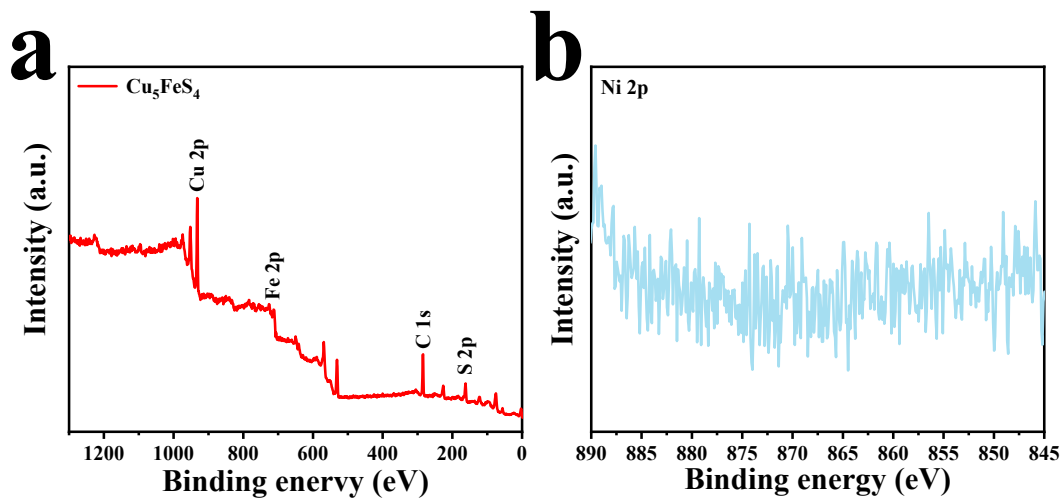

**Fig. S4** XPS spectra of  $\text{Cu}_5\text{FeS}_4$  QDs: (a) survey and (b) Ni 2p.

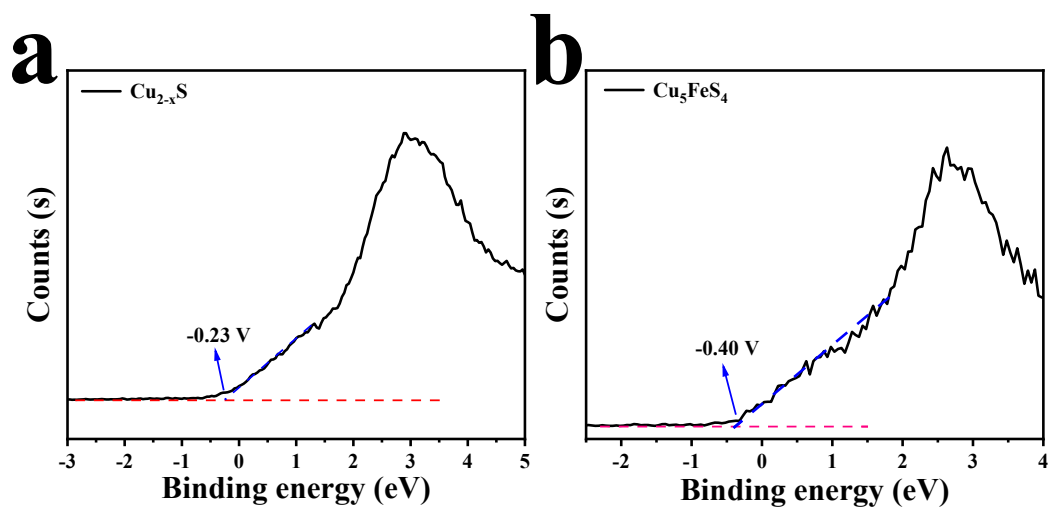

**Fig. S5** The XPS valence band spectra of (a)  $\text{Cu}_{2-x}\text{S}$  QDs and (b)  $\text{Cu}_5\text{FeS}_4$ .

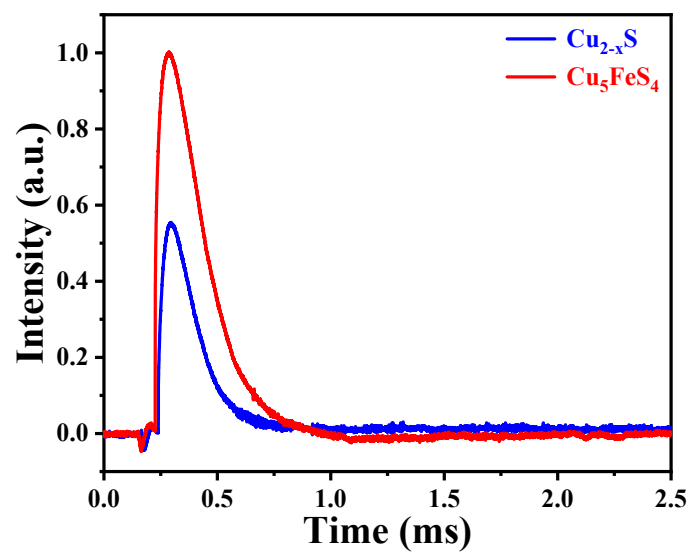

**Fig. S6** TPV relaxation curves of  $\text{Cu}_{2-x}\text{S}$  QDs and  $\text{Cu}_5\text{FeS}_4$ .



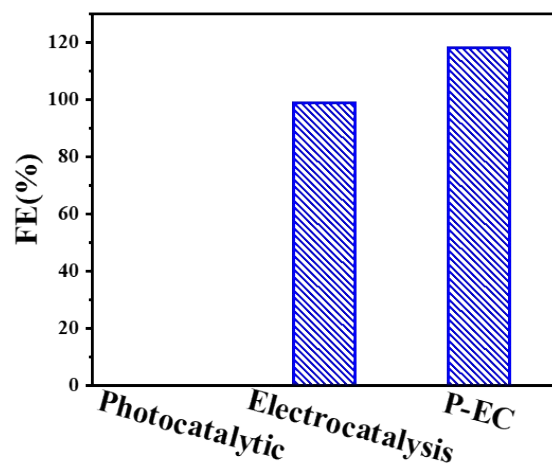

**Fig. S7** The FE of electrocatalytic, photocatalytic and P-EC hydrogen production.

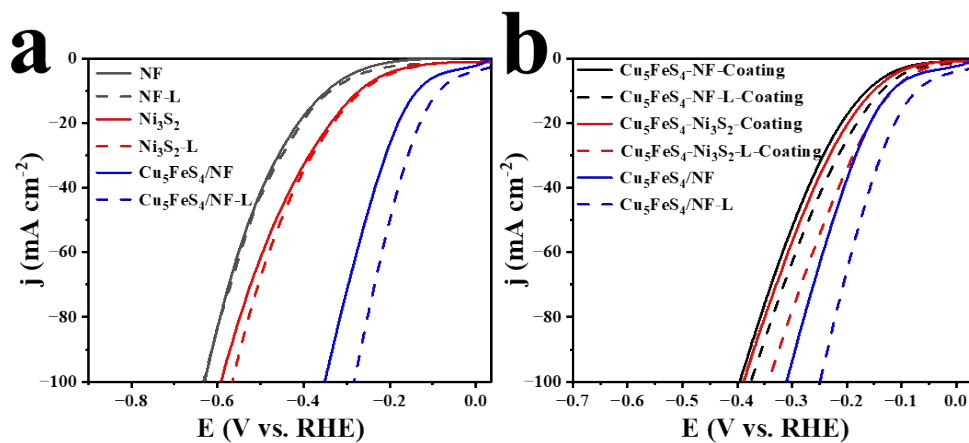

**Fig. S8** The electrocatalytic and P-EC HER activity of (a) NF, NF-L, Ni<sub>3</sub>S<sub>2</sub>, Ni<sub>3</sub>S<sub>2</sub>-L, Cu<sub>5</sub>FeS<sub>4</sub>/NF and Cu<sub>5</sub>FeS<sub>4</sub>/NF-L and (b) Cu<sub>5</sub>FeS<sub>4</sub>-NF, Cu<sub>5</sub>FeS<sub>4</sub>-NF-L, Cu<sub>5</sub>FeS<sub>4</sub>-Ni<sub>3</sub>S<sub>2</sub>, Cu<sub>5</sub>FeS<sub>4</sub>-Ni<sub>3</sub>S<sub>2</sub>-L, Cu<sub>5</sub>FeS<sub>4</sub>/NF and Cu<sub>5</sub>FeS<sub>4</sub>/NF-L.

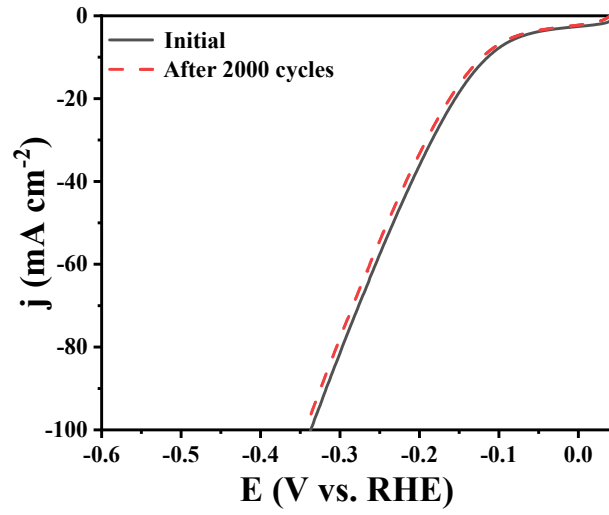

**Fig. S9** Polarization curves of Cu<sub>5</sub>FeS<sub>4</sub>/NF before and after 2000 CV cycles under dark.

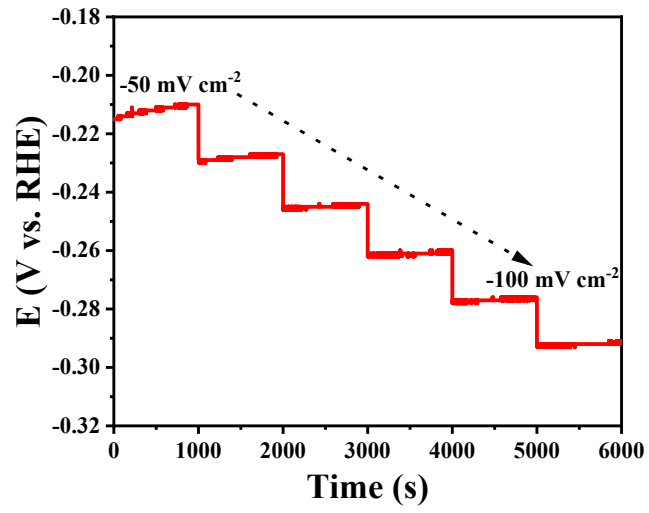

**Fig. S10** The multi-current-process i-t curve of Cu<sub>5</sub>FeS<sub>4</sub>/NF under dark.

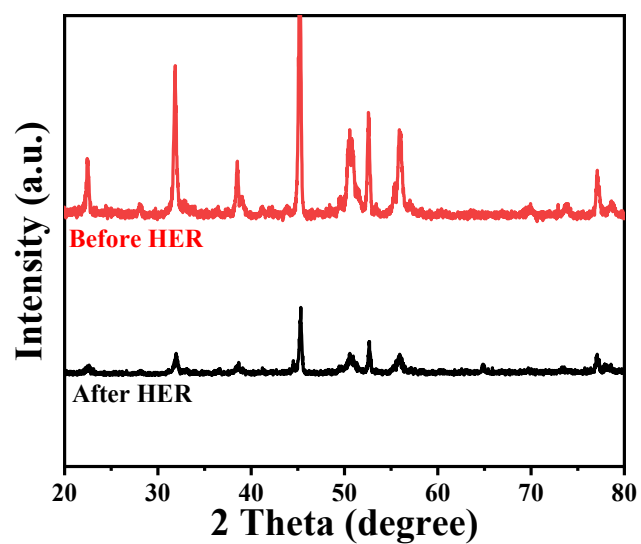

**Fig. S11** XRD patterns of Cu<sub>5</sub>FeS<sub>4</sub>/NF before and after P-EC catalysis test of 20 h under continuous light irradiation.

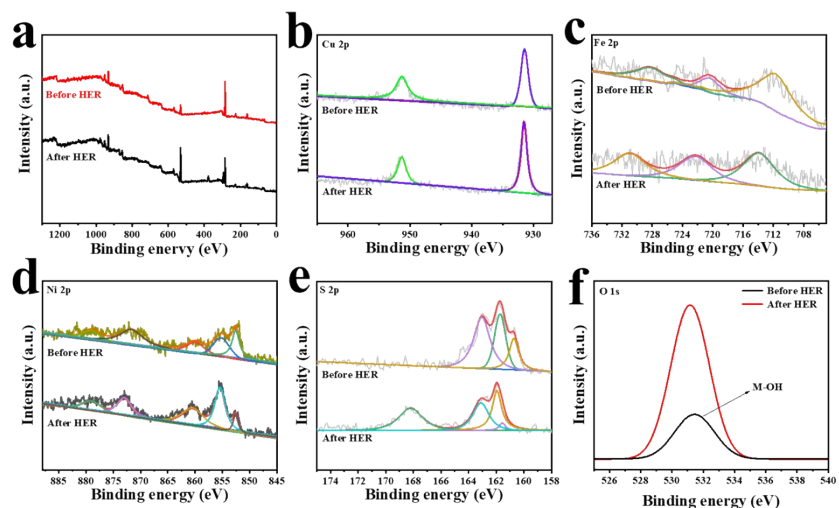

**Fig. S12** XPS of  $\text{Cu}_5\text{FeS}_4/\text{NF}$  before and after P-EC test of 20 h under continuous light irradiation: (a) survey, (b) Cu 2p, (c) Fe 2p, (d) Ni 2p, (e) S 2p and (f) O 1s.

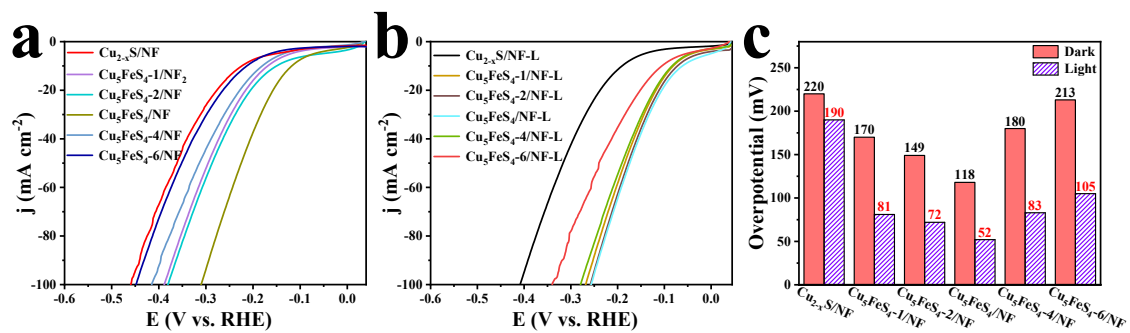

**Fig. S13** Polarization curves of (a) electrocatalytic and (b) P-EC with different Cu/Fe ratios. (c) The corresponding overpotentials at current density of 10 mA cm<sup>-2</sup> for different electrodes.

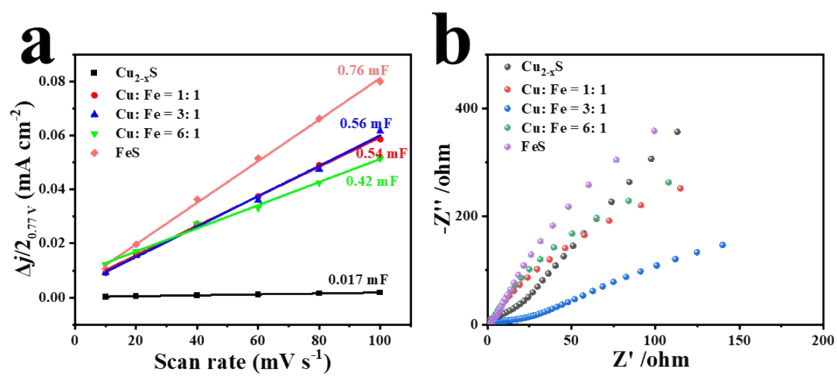

**Fig. S14** (a) C<sub>dl</sub> and (b) EIS patterns of the catalysts different Cu/Fe ratios.



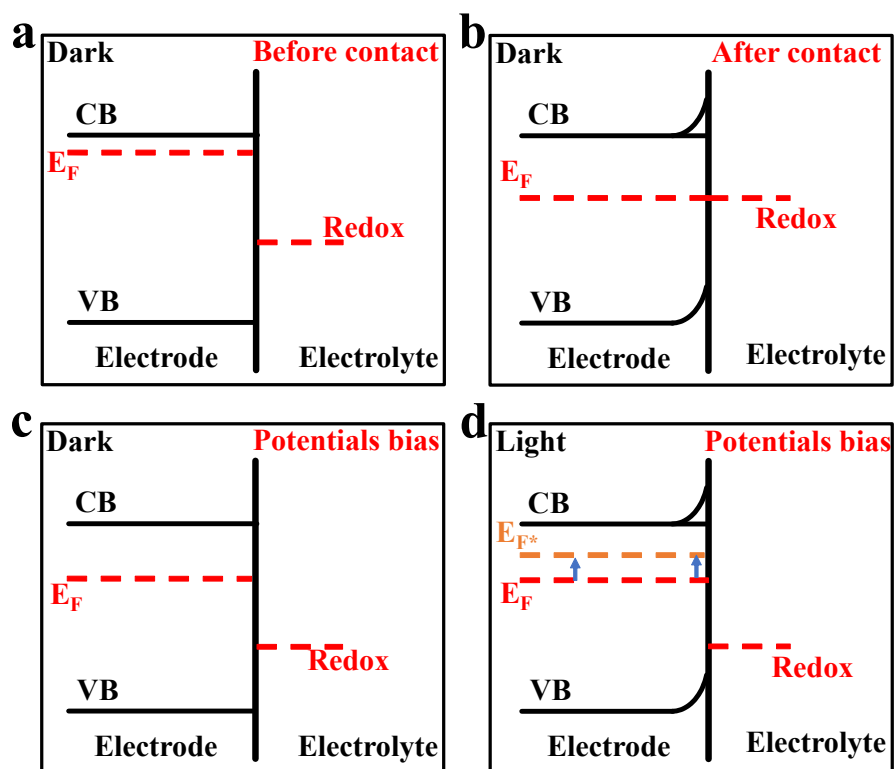

**Fig. S15** Conduction and Valence band behaviour in electrode and electrolyte interface: (a) before contact, (b) after contact, (c) and (d) under potential bias without and with light, respectively.

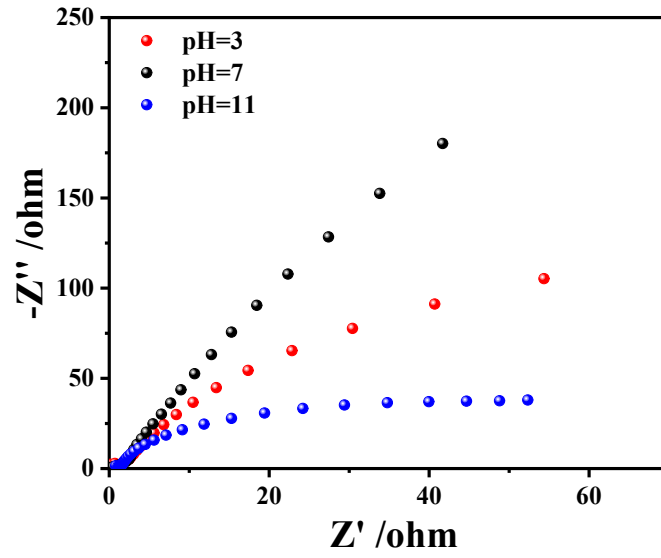

**Fig. S16** EIS patterns of  $\text{Cu}_5\text{FeS}_4/\text{NF}$  in three different electrolytes (pH = 3, 7 and 11).

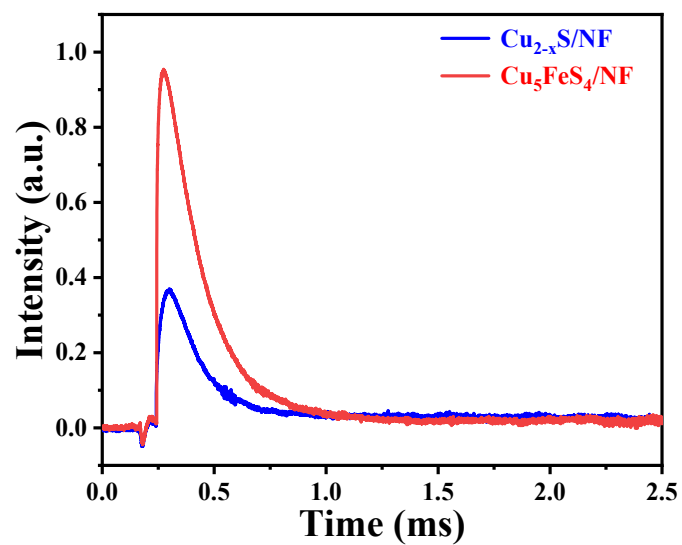

**Fig. S17** TPV relaxation curves of  $\text{Cu}_{2-x}\text{S}/\text{NF}$  and  $\text{Cu}_5\text{FeS}_4/\text{NF}$ .

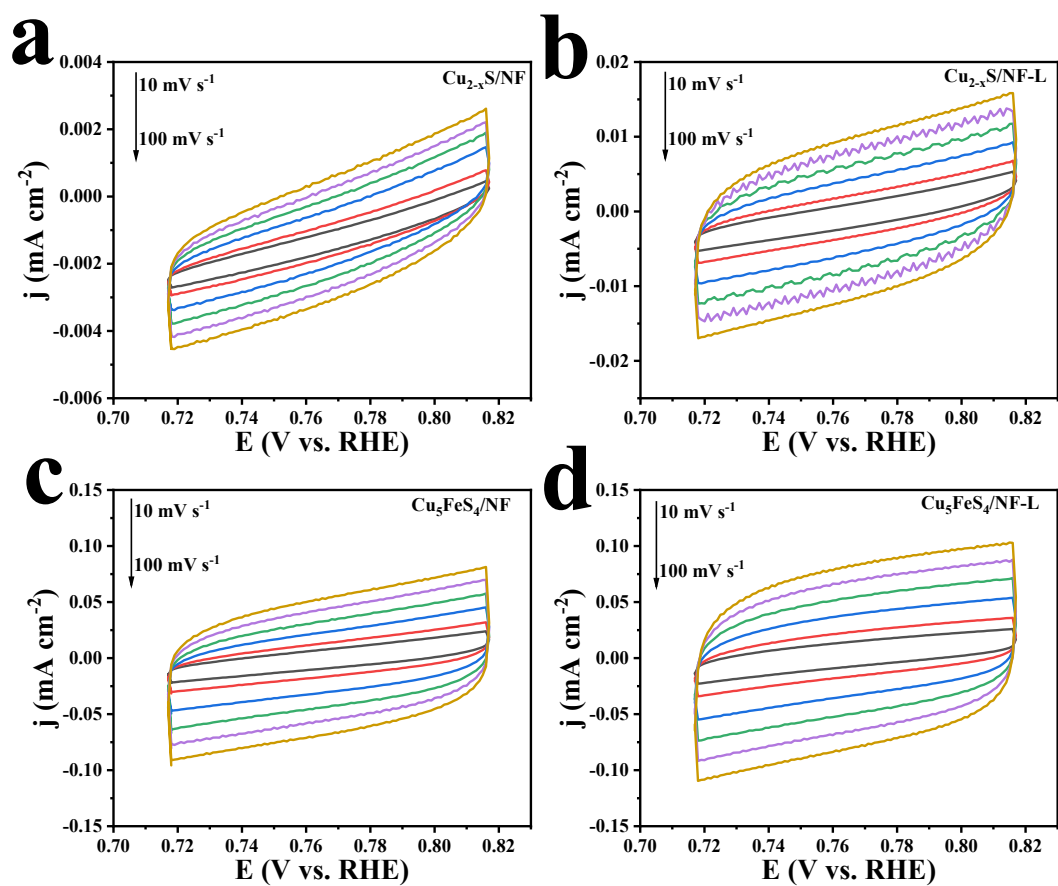

**Fig. S18** CV curves at different scan rates of  $\text{Cu}_{2-x}\text{S}/\text{NF}$  without (a) and with light (b); CV curves at different scan rates of  $\text{Cu}_5\text{FeS}_4/\text{NF}$  without (c) and with light (d).

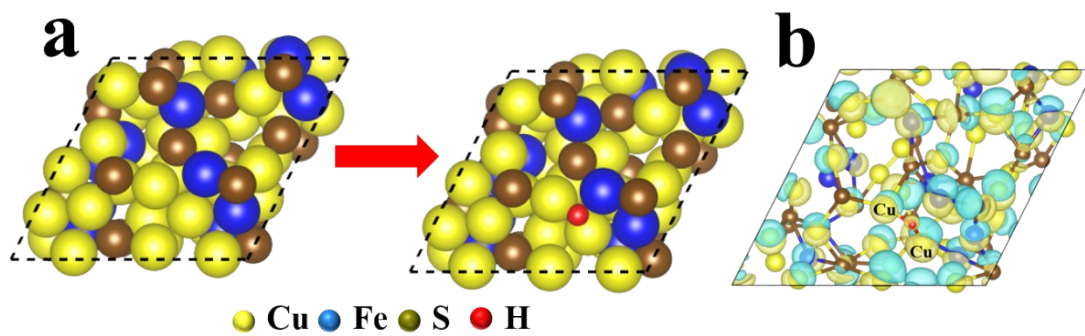

**Fig. S19** (a) Top view of  $H^+$  adsorption and (b) charge density difference of  $Cu_5FeS_4$  QDs without light.

**Table S1** HER performance comparison between Cu<sub>5</sub>FeS<sub>4</sub>/NF-L in our work and other cheap transition metal catalysts reported previously.

| Catalysts                                                          | Electrolyte                          | Overpotential<br>at 10 mA cm <sup>-2</sup> (mV) | Refs.            |
|--------------------------------------------------------------------|--------------------------------------|-------------------------------------------------|------------------|
| <b>Cu<sub>5</sub>FeS<sub>4</sub>/NF-L</b>                          | <b>1M KOH</b>                        | <b>52</b>                                       | <b>This work</b> |
| TiS <sub>2-x</sub> /NiS                                            | 1M KOH                               | 63                                              | 1                |
| Ni-Fe-P-Ni <sub>3</sub> S <sub>2</sub> /NF                         | 1M KOH                               | 65                                              | 2                |
| MoS <sub>2</sub> -RGO                                              | 0.5 M H <sub>2</sub> SO <sub>4</sub> | 66                                              | 3                |
| N-NiMoS                                                            | 0.1 M KOH                            | 68                                              | 4                |
| CdS@Co <sub>8</sub> S <sub>9</sub> /Ni <sub>3</sub> S <sub>2</sub> | 1M KOH                               | 69.6                                            | 5                |
| Fe <sub>x</sub> Ni <sub>3-x</sub> S <sub>2</sub> @NF               | 1M KOH                               | 72                                              | 6                |
| N-NiS <sub>2</sub> /CoS <sub>2</sub>                               | 1M KOH                               | 73                                              | 7                |
| NiFeCoS <sub>x</sub> @FeNi <sub>3</sub>                            | 1M KOH                               | 88                                              | 8                |
| N-NiMoO <sub>4</sub> /NiS <sub>2</sub>                             | 1M KOH                               | 99                                              | 9                |
| NiSe-Ni <sub>0.85</sub> Se                                         | 1M KOH                               | 101                                             | 10               |
| Fe-Ni <sub>3</sub> S <sub>2</sub> @FeNi <sub>3</sub>               | 1M KOH                               | 105                                             | 11               |
| B-Fe <sub>7</sub> S <sub>8</sub> /FeS <sub>2</sub>                 | 1M KOH                               | 113                                             | 12               |
| W-NiO/NiS <sub>2</sub>                                             | 1M KOH                               | 116                                             | 13               |
| NiCo <sub>2</sub> S <sub>4</sub> /Ni <sub>3</sub> S <sub>2</sub>   | 1M KOH                               | 127                                             | 14               |
| Fe-CoMoS                                                           | 1M KOH                               | 137                                             | 15               |
| Co <sub>0.9</sub> S <sub>0.58</sub> P <sub>0.42</sub>              | 1M KOH                               | 141                                             | 16               |
| FeS                                                                | 1M KOH                               | 142                                             | 17               |
| Ni <sub>3</sub> S <sub>2</sub>                                     | 1M KOH                               | 147                                             | 18               |
| Co <sub>9</sub> S <sub>8</sub> -MoS <sub>2</sub> /N-CNAs@CNFs      | 1M KOH                               | 163                                             | 19               |
| Fe <sub>0.95-x</sub> Ni <sub>x</sub> S <sub>1.05</sub>             | 1M KOH                               | 263                                             | [0]              |

**Table S2** The  $R_{ct}$  values of  $Cu_5FeS_4/NF$  in different electrolytes with/without light.

| Samples | Dark ( $\Omega\text{ cm}^2$ ) | Light ( $\Omega\text{ cm}^2$ ) |
|---------|-------------------------------|--------------------------------|
| pH=3    | 320.5                         | 155.6                          |
| pH=7    | 478.9                         | 424.2                          |
| pH=11   | 270.7                         | 73.8                           |

**Table S3** Fitting parameters of the EIS data of different samples using the equivalent circuit in the inset of Fig. 5f.

| Samples                               | $R_s$ ( $\Omega \text{ cm}^2$ ) | $R_{ct}$ ( $\Omega \text{ cm}^2$ ) |
|---------------------------------------|---------------------------------|------------------------------------|
| $\text{Cu}_{2-x}\text{S}/\text{NF}$   | 112.3                           | 1165.3                             |
| $\text{Cu}_{2-x}\text{S}/\text{NF-L}$ | 28.8                            | 283.9                              |
| $\text{Cu}_5\text{FeS}_4/\text{NF}$   | 19.4                            | 268.8                              |
| $\text{Cu}_5\text{FeS}_4/\text{NF-L}$ | 1.3                             | 24.9                               |



## References:

- 1 J. Wu, W. Zhong, C. Yang, W. Xu, R. Zhao, H. Xiang, Q. Zhang, X. Li and N. Yang, *Appl. Catal., B*, 2022, **310**, 121332.
- 2 Z. Li, K. Wang, X. Tan, X. Liu, G. Wang, G. Xie and L. Jiang, *Chem. Eng. J.*, 2021, **424**, 130390.
- 3 X. Gao, J. Qi, S. Wan, W. Zhang, Q. Wang and R. Cao, *Small* 2018, **14**, 1803361
- 4 C. Huang, L. Yu, W. Zhang, Q. Xiao, J. Zhou, Y. Zhang, P. An, J. Zhang and Y. Yu, *Appl. Catal., B*, 2020, **276**, 119137.
- 5 F. Si, C. Tang, Q. Gao, F. Peng, S. Zhang, Y. Fang and S. Yang, *J. Mater. Chem. A*, 2020, **8**, 3083-3096.
- 6 B. Fei, Z. Chen, J. Liu, H. Xu, X. Yan, H. Qing, M. Chen and R. Wu, *Adv., Energy Mater.*, 2020, **10**, 2001963.
- 7 B. Qiu, Y. Zhang, X. Guo, Y. Ma, M. Du, J. Fan, Y. Zhu, Z. Zeng and Y. Chai, *J. Mater. Chem. A*, 2022, **10**, 719-725.
- 8 J. Shen, Q. Li, W. Zhang, Z. Cai, L. Cui, X. Liu and J. Liu, *J. Mater. Chem. A*, 2022, **10**, 5442-5451.
- 9 L. An, J. Feng, Y. Zhang, R. Wang, H. Liu, G.-C. Wang, F. Cheng and P. Xi, *Adv. Funct. Mater.*, 2019, **29**, 1805298.
- 10 Y. Chen, Z. Ren, H. Fu, X. Zhang, G. Tian and H. Fu, *Small*, 2018, **14**, 1800763.
- 11 W. Zhang, Q. Jia, H. Liang, L. Cui, D. Wei and J. Liu, *Chem. Eng. J.*, 2020, **396**, 125315.
- 12 J. Wu, Q. Zhang, K. Shen, R. Zhao, W. Zhong, C. Yang, H. Xiang, X. Li and N. Yang, *Adv. Funct. Mater.*, 2021, **32**, 2107802.
- 13 H. Wang, T. Liu, K. Bao, J. Cao, J. Feng and J. Qi, *J. Colloid Interface Sci.*, 2020, **562**, 363-369.
- 14 X. Zhao, H. Liu, Y. Rao, X. Li, J. Wang, G. Xia and M. Wu, *ACS Sust. Chem. Engin.*, 2018, **7**, 2610-2618.
- 15 Y. Guo, X. Zhou, J. Tang, S. Tanaka, Y.V. Kaneti, J. Na, B. Jiang, Y. Yamauchi, Y. Bando and Y. Sugahara, *Nano Energy*, 2020, **75**, 104913.
- 16 Z. Dai, H. Geng, J. Wang, Y. Luo, B. Li, Y. Zong, J. Yang, Y. Guo, Y. Zheng, X.

- Wang and Q. Yan, *ACS Nano*, 2017, **11**, 11031-11040.
- 17 G. Zhou, Y. Shan, L. Wang, Y. Hu, J. Guo, F. Hu, J. Shen, Y. Gu, J. Cui, L. Liu and X. Wu, *Nat. Commun.*, 2019, **10**, 399.
- 18 X. Shi, X. Ling, L. Li, C. Zhong, Y. Deng, X. Han and W. Hu, *J. Mater. Chem. A*, 2019, **7**, 23787-23793.
- 19 W. Zhang, X. Zhao, Y. Zhao, J. Zhang, X. Li, L. Fang and L. Li, *ACS Appl. Mater. Interfaces*, 2020, **12**, 10280-10290.
- 20 Z. Jing, Q. Zhao, D. Zheng, L. Sun, J. Geng, Q. Zhou and J. Lin, *J. Mater. Chem. A*, 2020, **8**, 20323-20330.
